# Supplementary material
Source: PubMed Central journal article supplement (PMC8136338)
Supplement: NIHMS1701924-supplement-Appendix.pdf [file NIHMS1701924-supplement-Appendix.pdf]

The following content was supplied by the authors as supporting material and has not been copy-edited or verified by JBJS.

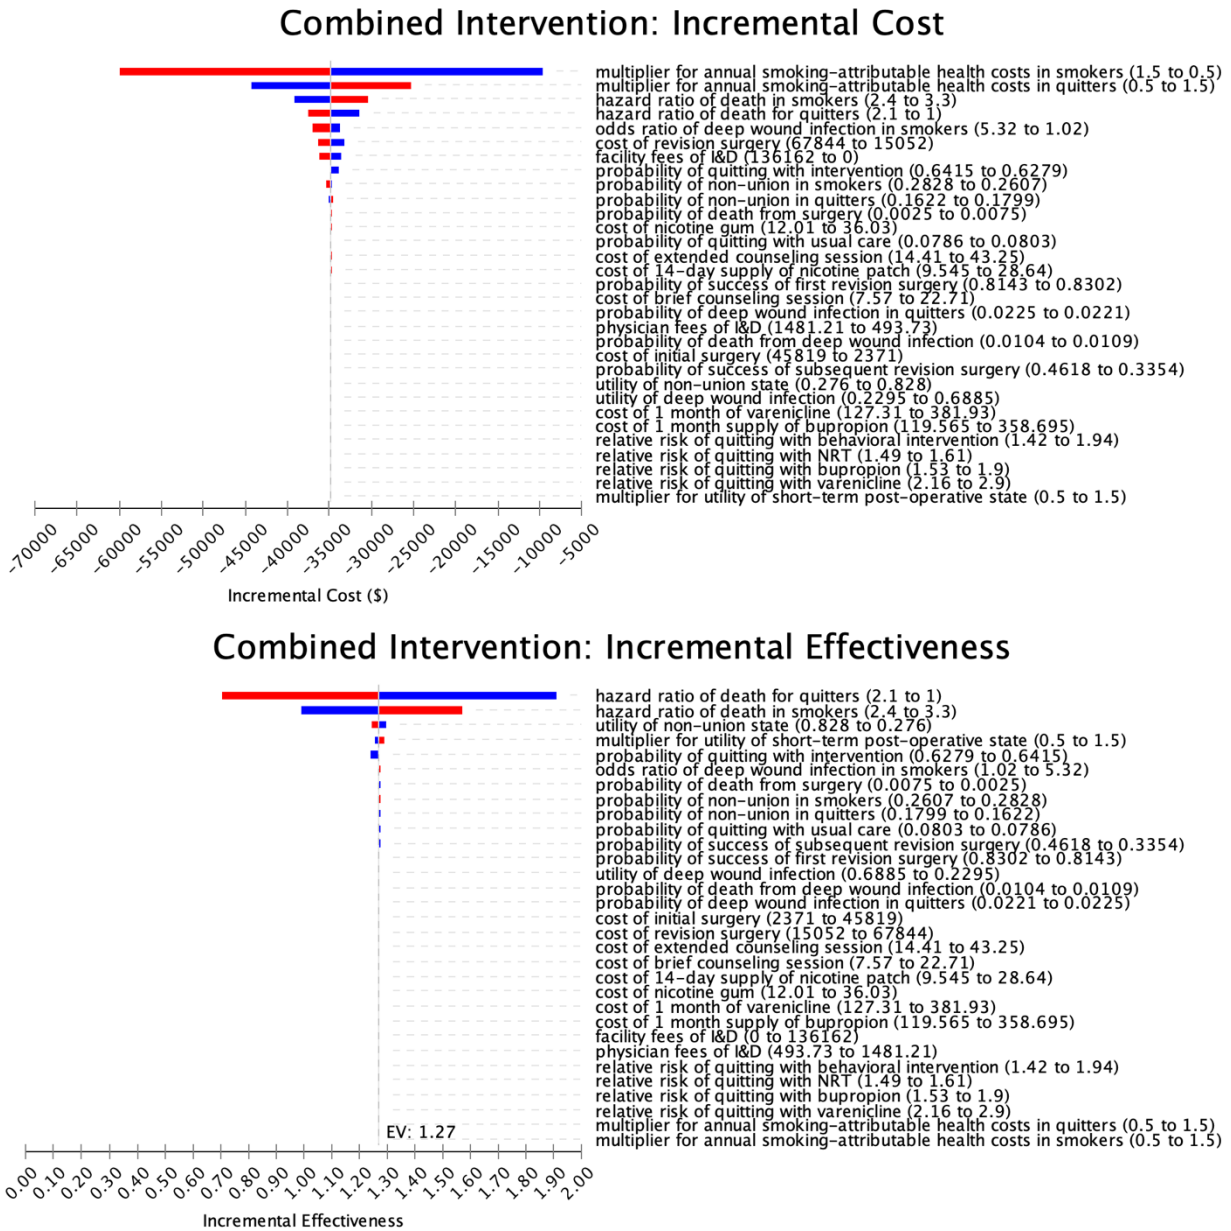

**Figure S1.** Tornado plots for (*top*) incremental costs and (*bottom*) incremental effectiveness of smoking cessation intervention versus usual care as each variable is varied across its range for the combined intervention on the lifetime horizon.

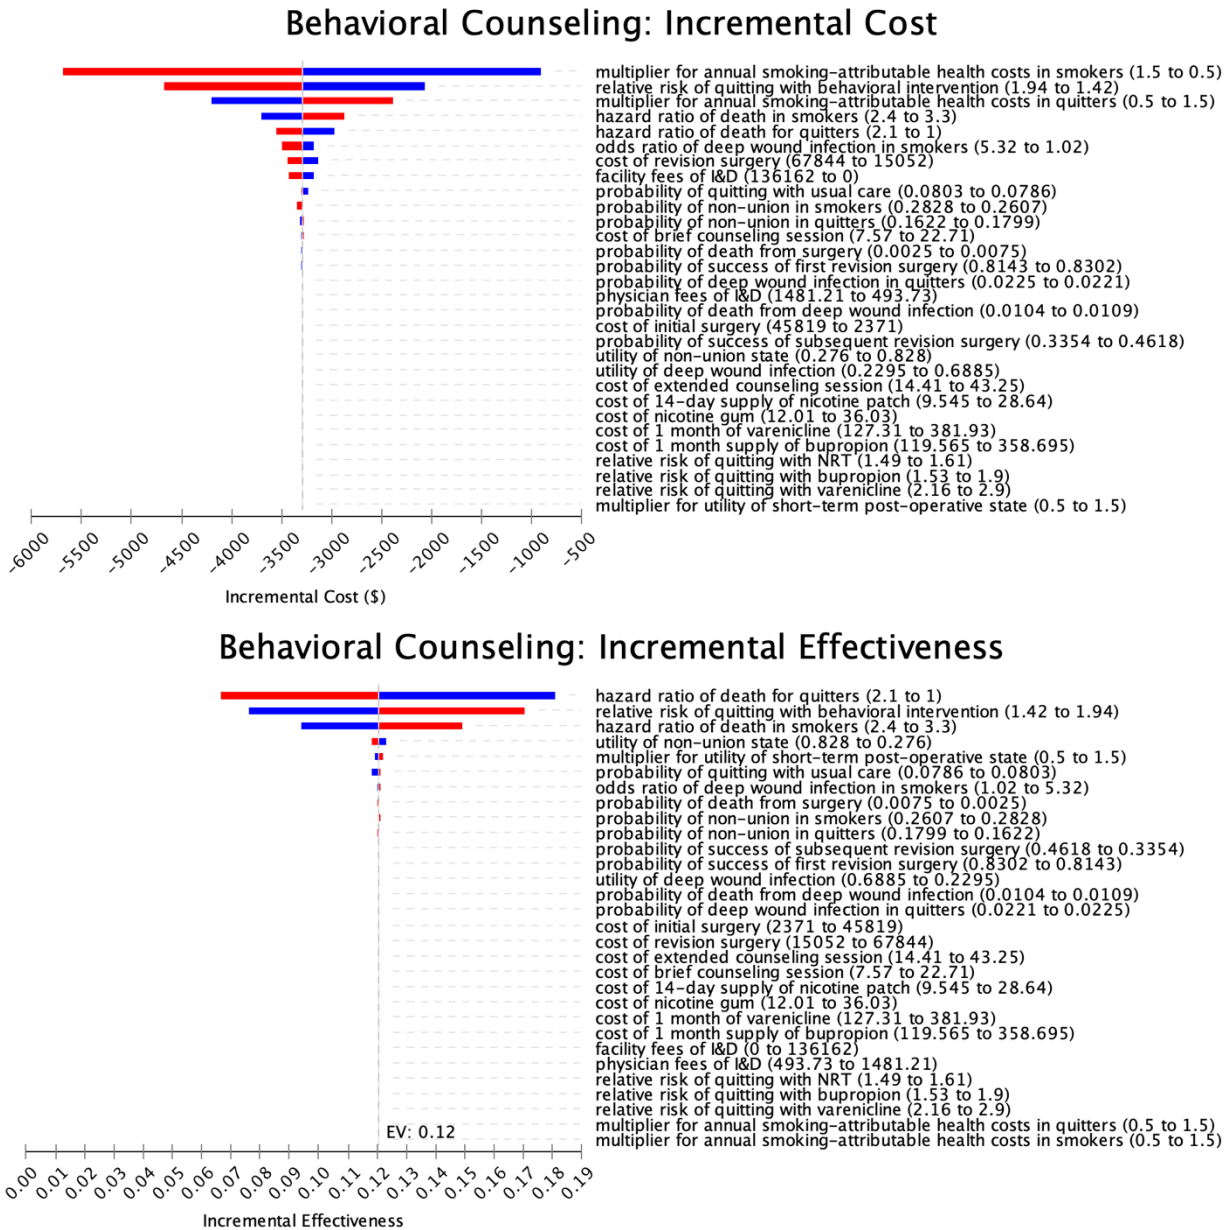

**Figure S2.** Tornado plots for (*top*) incremental costs and (*bottom*) incremental effectiveness of smoking cessation intervention versus usual care as each variable is varied across its range for behavioral counseling on the lifetime horizon.

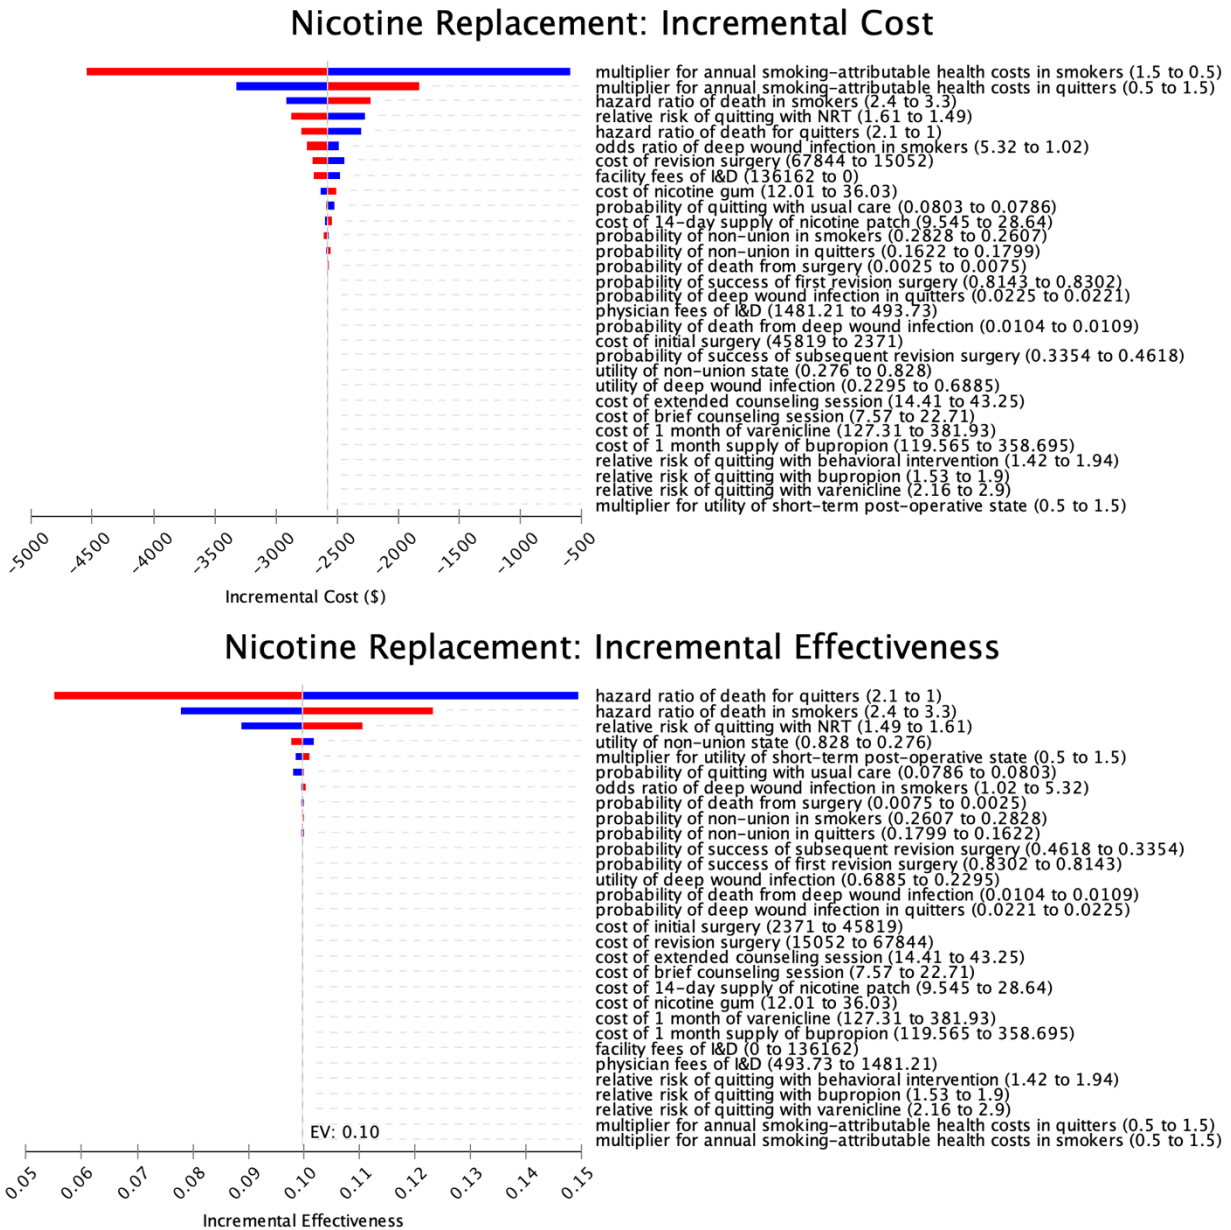

**Figure S3.** Tornado plots for (*top*) incremental costs and (*bottom*) incremental effectiveness of smoking cessation intervention versus usual care as each variable is varied across its range for nicotine replacement therapy on the lifetime horizon.

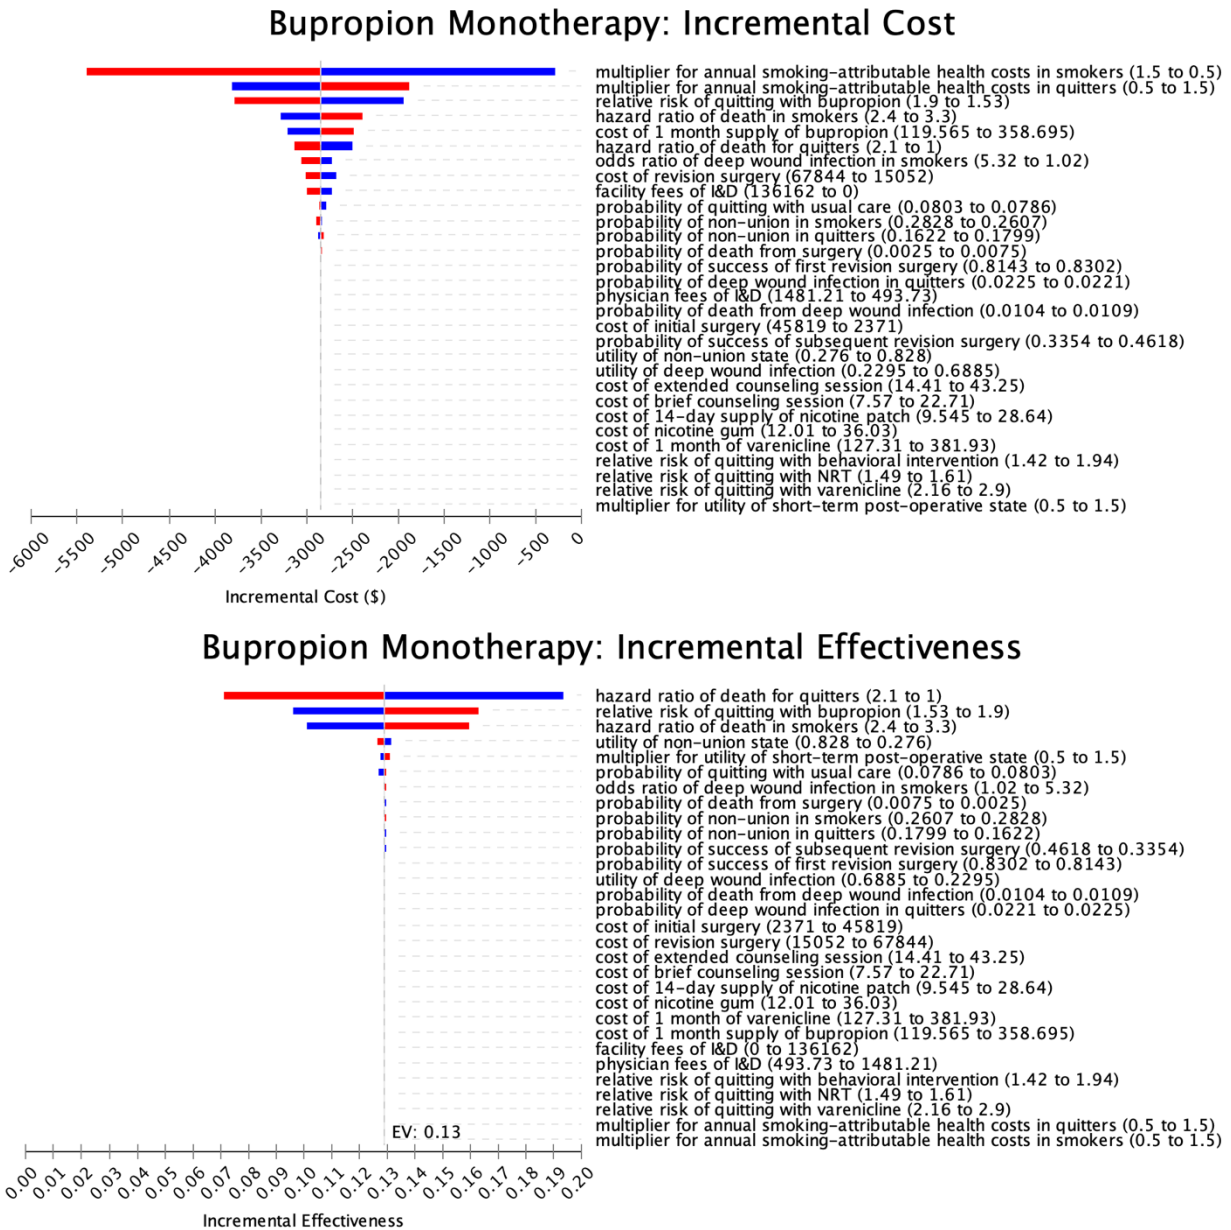

**Figure S4.** Tornado plots for (*top*) incremental costs and (*bottom*) incremental effectiveness of smoking cessation intervention versus usual care as each variable is varied across its range for bupropion monotherapy on the lifetime horizon.

### Varenicline Monotherapy: Incremental Cost

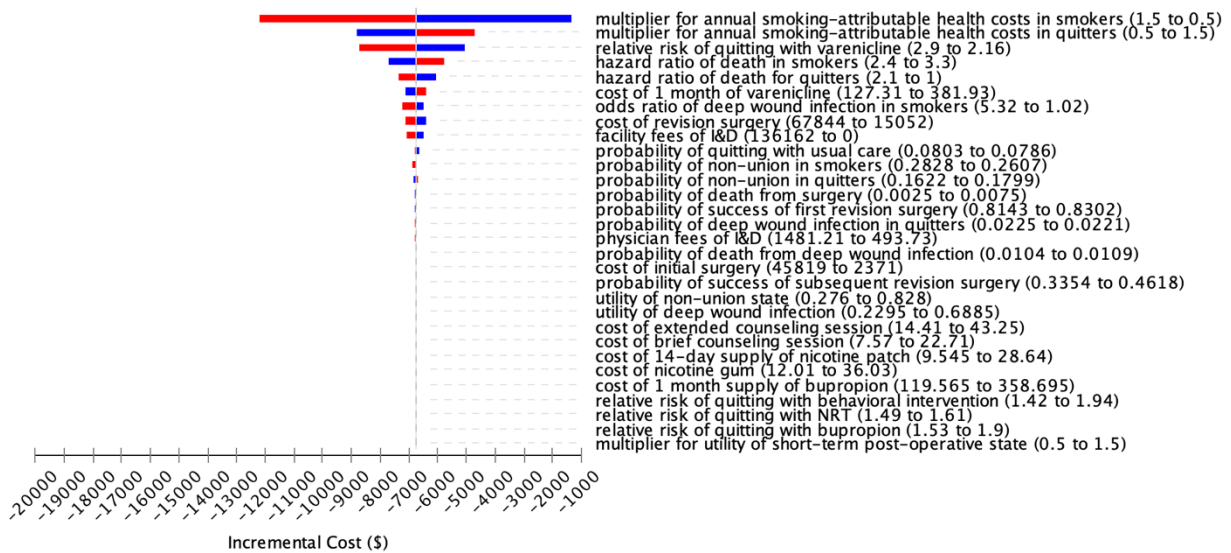

### Varenicline Monotherapy: Incremental Effectiveness

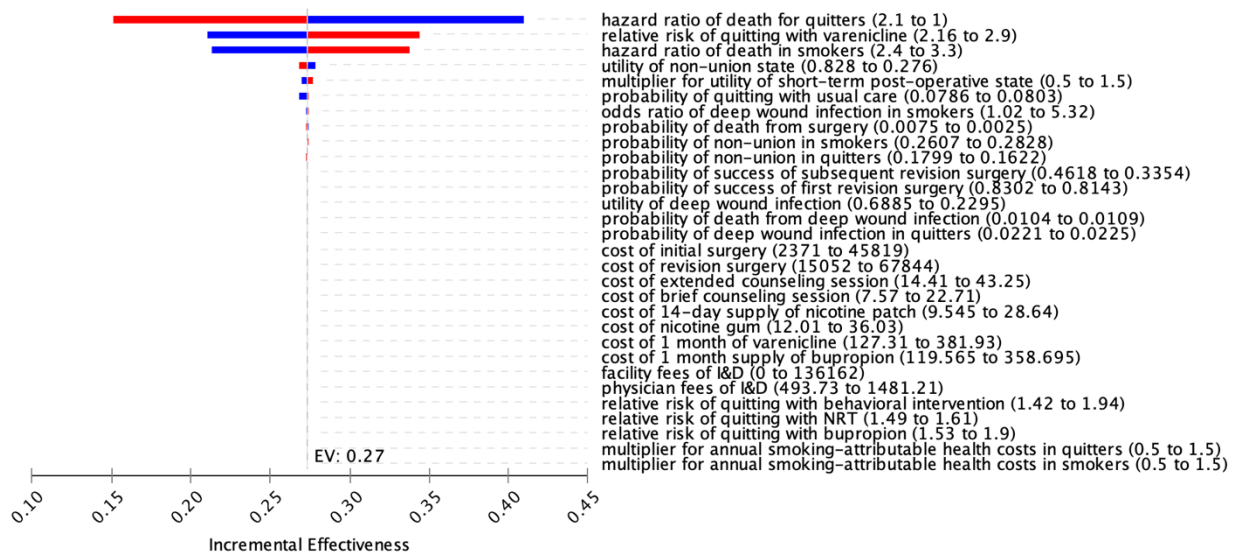

**Figure S5.** Tornado plots for (*top*) incremental costs and (*bottom*) incremental effectiveness of smoking cessation intervention versus usual care as each variable is varied across its range for varenicline monotherapy on the lifetime horizon.

### *Model Validation*

Internal validity was tested by constructing two separate models. The first model utilized point estimates for all model parameters. The second model was constructed for the probabilistic sensitivity analysis and utilized probability distributions for all model parameters. The output of these two models were in agreement. Two analysts also independently verified these models.

To assess the external validity of our model, we first predicted 30-day mortality rates for smokers and quitters undergoing lumbar fusion using our model and compared them to those from an independent study that was not used to estimate our model parameters.<sup>1</sup> The 30-day mortality rates predicted by our model were as follows: in a cohort of smokers with a mean age of 49 years, 30-day mortality was 0.64% and in a cohort of quitters with a mean age of 62 years, 30-day mortality was 0.67%. These were qualitatively consistent with the 30-day mortality rates described in the independent study, i.e. 0.4% for current smokers and 0.3% for prior smokers.<sup>1</sup> By reducing the baseline probability of death with surgery to ~0.2%, we could bring our model into quantitative agreement with those described mortality rates. This resulted in a 0.3% change in cost savings, which falls well within one standard deviation of the estimate in our base model [Note: the standard deviation (across 10,000 Monte Carlo simulations) of our base-case estimate for cost-savings ranges from 12 – 29% of the mean estimate].

In addition, we compared the long-term difference in mortality for smokers versus quitters predicted by our model with actual differences in life expectancy that Taylor et al. has calculated from the Cancer Prevention II study.<sup>2</sup> The gain in life expectancy from smoking cessation predicted by our model for the base case (i.e. 45-year old patient) was in excellent agreement with those observed by Taylor et al. (Table S1). The gain in life expectancy predicted for a 55-year old in our model was also in good agreement with those observed. The gain in life expectancy predicted for a 35-year old in our model deviated from those observed. Two possibilities can account for this discrepancy. First, compared to the study we used to generate our model,<sup>3</sup> Taylor et al. may underestimate the permanent, deleterious effects of smoking in younger populations and thus overestimate the benefit of quitting at younger ages. This would result in an overestimation of the difference in mortality between a 35-year old quitter and a 45-year old quitter. In concrete terms, Taylor et al.'s calculations show that a 35-year old male quitter in 1990 could expect to live another 41.2 years.<sup>2</sup> According to U.S. life tables from 1990,<sup>4</sup> a 35-year old male in the general population could expect to live another 39.6 years. In other words, a 35-year old quitter could expect no excess mortality attributable to smoking. However, the study used in our model found a 10-30% increase in mortality in quitters aged 35-44 years, depending on sex.<sup>3</sup> Alternatively, our model may overestimate the potential mortality benefits of quitting at younger ages. Again, we can bring our model output into quantitative agreement with Taylor et al.'s values by adjusting the hazard ratio for death in 35-year old male quitters from 1.1 to 1.37 and in 35-year old female quitters from 1.3 to 1.59. Substituting these derived hazard ratios into our model results in a 4.8% change in cost savings for a 35-year old male and a 13.4% change for a 35-year old female. In comparison, the standard deviation of cost savings across 10,000 Monte Carlo simulations for a 35-year old male or 35-year old female ranges from 13 – 24% of the mean estimate in our base model (depending on intervention). In other words, the point estimate for cost savings obtained by using the derived hazard ratios lies within one

standard deviation of the mean estimate produced using our base model. Therefore, our model produces predictions that appear to be externally valid in both the short- and long-term.

**Table S1.** Comparison of Predicted and Observed Gain in Life Expectancy from Quitting

| Age            | Gain in Life Expectancy (Relative to Continuing Smoker) in Years |        |            |        |
|----------------|------------------------------------------------------------------|--------|------------|--------|
|                | Taylor et al. <sup>2</sup>                                       |        | This study |        |
|                | Male                                                             | Female | Male       | Female |
| Quit at age 35 | 8.5                                                              | 7.7    | 10.8       | 9.8    |
| Quit at age 45 | 7.1                                                              | 7.2    | 6.9        | 7.0    |
| Quit at age 55 | 4.8                                                              | 5.6    | 4.9        | 5.0    |

Gain in life expectancy in this study was calculated by subtracting the age at which 50% of the quitting cohort reached the death state in the Markov model from the age at which 50% of the smoking cohort reached the death state.



**Table S2.** Level of Evidence\* Rating for Model Inputs

| <b>Variable</b>                                             | <b>Authors (Year)</b>                  | <b>Level of Evidence*</b> |
|-------------------------------------------------------------|----------------------------------------|---------------------------|
| Smoking cessation without intervention                      | Huges et al. (1992)                    | Prognostic Level II       |
| Smoking cessation with behavioral intervention              | Stead et al. (2013)                    | Therapeutic Level I       |
| Smoking cessation with nicotine replacement therapy         | Hartmann-Boyce et al. (2018)           | Therapeutic Level I       |
| Smoking cessation with bupropion or varenicline monotherapy | Cahill et al. (2013)                   | Therapeutic Level I       |
| Smoking cessation with combined intervention                | Møller, Kjellberg, and Pedersen (2006) | Therapeutic Level I       |
| Probability of non-union in smoker or quitter               | Glassman et al. (2000)                 | Prognostic Level III      |
| Probability of deep infection in smoker or quitter          | Schimmel et al. (2010)                 | Prognostic Level III      |
| Successful correction of non-union                          | Carpenter et al. (1996)                | Prognostic Level III      |
| Mortality from deep infection and surgery                   | Veeravagu et al. (2009)                | Prognostic Level III      |
| Hazard ratios for mortality in smokers and quitters         | Jha et al. (2013)                      | Prognostic Level II       |
| Annual probability of smoking relapse                       | Hughes, Peters, and Naud (2008)        | Therapeutic Level I       |

\*Level of evidence was rated according to *JBJS* criteria, available here:

<https://journals.lww.com/jbjsjournal/Pages/Journals-Level-of-Evidence.aspx>.

**Table S3.** Ranges Used in Sensitivity Analyses and PSA Parameters

|                                                   | Variable                                              | Range for One-Way Sensitivity Analyses | Parameters for Probabilistic Sensitivity Analysis |
|---------------------------------------------------|-------------------------------------------------------|----------------------------------------|---------------------------------------------------|
| Probabilities                                     | Baseline, smoking cessation without intervention      | 0.0786 – 0.0803                        | $\alpha = 50, \beta = 580$                        |
|                                                   | RR with behavioral intervention alone                 | 1.42 – 1.94                            | $\mu = 0.5067, \sigma = 0.0780$                   |
|                                                   | RR with nicotine replacement therapy <sup>†</sup>     | 1.49 – 1.61                            | $\mu = 0.4375, \sigma = 0.0194$                   |
|                                                   | Corrected RR for bupropion monotherapy <sup>†</sup>   | 1.53 – 1.90                            | $\mu = 0.5336, \sigma = 0.0541$                   |
|                                                   | Corrected RR for varenicline monotherapy <sup>†</sup> | 2.16 – 2.90                            | $\mu = 0.9174, \sigma = 0.0737$                   |
|                                                   | Smoking cessation with combined intervention          | 0.6279 – 0.6415                        | $\alpha = 77, \beta = 43$                         |
|                                                   | Non-union                                             |                                        |                                                   |
|                                                   | Smoker                                                | 0.2607 – 0.2828                        | $\alpha = 18, \beta = 50$                         |
|                                                   | Quitter                                               | 0.1622 – 0.1799                        | $\alpha = 13, \beta = 63$                         |
|                                                   | Deep infection in quitter                             | 0.0221 – 0.0225                        | $\alpha = 36, \beta = 1,579$                      |
| OR of deep infection in smoker                    | 1.02 – 5.32                                           | $\mu = 0.8456, \sigma = 0.4129$        |                                                   |
| Successful correction of non-union                | First attempt                                         | 0.8143 – 0.8302                        | $\alpha = 71, \beta = 15$                         |
|                                                   | Subsequent attempt                                    | 0.3354 – 0.4618                        | $\alpha = 6, \beta = 9$                           |
| Mortality from deep infection                     | 0.0104 – 0.0109                                       | $\alpha = 8, \beta = 744$              |                                                   |
| Mortality from surgery                            | 50-150% of base value                                 | $\alpha = 120, \beta = 23,902$         |                                                   |
| Baseline mortality                                | HR for mortality in smoker, male                      | 2.4 – 3.3                              | $\mu = 1.0034, \sigma = 0.0492$                   |
|                                                   | HR for mortality in smoker, female                    | 2.4 – 3.3                              | $\mu = 1.0936, \sigma = 0.0386$                   |
|                                                   | HR for mortality in 35-year old quitter, male         | 1.0 – 2.1                              | $\mu = 0.1682, \sigma = 0.0647$                   |
|                                                   | HR for mortality in 35-year old quitter, female       | 1.0 – 2.1                              | $\mu = 0.2827, \sigma = 0.0721$                   |
|                                                   | HR for mortality in 45-year old quitter, male         | 1.0 – 2.1                              | $\mu = 0.3565, \sigma = 0.0670$                   |
|                                                   | HR for mortality in 45-year old quitter, female       | 1.0 – 2.1                              | $\mu = 0.4521, \sigma = 0.0730$                   |
|                                                   | HR for mortality in 55-year old quitter, male         | 1.0 – 2.1                              | $\mu = 0.5148, \sigma = 0.0686$                   |
|                                                   | HR for mortality in 55-year old quitter, female       | 1.0 – 2.1                              | $\mu = 0.5737, \sigma = 0.0647$                   |
|                                                   | Annual probability of smoking relapse*                | N/A                                    | $\alpha = 9.73, \beta = 85.55$                    |
| Costs                                             | Smoking cessation intervention                        |                                        |                                                   |
|                                                   | Extended counseling session (over 10 min)             | 50-150% of base value                  | $\mu = 28.83, \sigma = 14.415$                    |
|                                                   | Abbreviated counseling session (3 – 10 min)           | 50-150% of base value                  | $\mu = 15.14, \sigma = 7.57$                      |
|                                                   | Nicotine patch (14-day supply)                        | 50-150% of base value                  | $\mu = 19.09, \sigma = 9.545$                     |
|                                                   | Nicotine gum starter kit (110 pieces)                 | 50-150% of base value                  | $\mu = 24.02, \sigma = 12.01$                     |
|                                                   | Varenicline starter pack (0.5mg x 11, 1mg x 42)       | 50-150% of base value                  | $\mu = 254.62, \sigma = 127.31$                   |
|                                                   | Varenicline continuing pack (1 mg x 56)               | 50-150% of base value                  | $\mu = 254.62, \sigma = 127.31$                   |
|                                                   | Bupropion (150mg x 60)                                | 50-150% of base value                  | $\mu = 239.13, \sigma = 119.565$                  |
|                                                   | Single-level instrumented posterolateral fusion       | \$2,371 – 45,819                       | $\mu = 24,095, \sigma = 10,862$                   |
|                                                   | Revision surgery                                      | \$15,052 – 67,844                      | $\mu = 41,448, \sigma = 13,198$                   |
| Deep infection treatment                          | Hospital                                              | \$0 – 136,162                          | $\mu = 61,866, \sigma = 37,148$                   |
|                                                   | Physician                                             | 50-150% of base value                  | $\mu = 987.47, \sigma = 493.735$                  |
| Baseline annual smoking-attributable health costs | Smoker                                                | 50-150% of base value                  | N/A                                               |
|                                                   | Quitter                                               | 50-150% of base value                  | N/A                                               |
| Utilities                                         | Deep infection                                        | 50-150% of base value                  | $\alpha = 1.7050, \beta = 2.0096$                 |
|                                                   | Non-union                                             | 50-150% of base value                  | $\alpha = 1.2400, \beta = 1.0064$                 |

|  |                        |                       |     |
|--|------------------------|-----------------------|-----|
|  | Stable, post-operative | 50-150% of base value | N/A |
|--|------------------------|-----------------------|-----|

For the PSA, we modeled probabilities and utilities with beta distributions, relative risks with log-normal distributions, and costs with normal distributions. \*The one-way sensitivity analyses shown were performed on the base model, which did not include smoking relapse; the beta distribution for this variable was estimated using its 95% confidence interval.

## References

1. Seicean A, Seicean S, Alan N, et al. Effect of Smoking on the Perioperative Outcomes of Patients Who Undergo Elective Spine Surgery. *Spine*. 2013;38(15).  
[https://journals.lww.com/spinejournal/Fulltext/2013/07010/Effect\\_of\\_Smoking\\_on\\_the\\_Periooperative\\_Outcomes\\_of.16.aspx](https://journals.lww.com/spinejournal/Fulltext/2013/07010/Effect_of_Smoking_on_the_Periooperative_Outcomes_of.16.aspx).
2. Taylor DH, Hasselblad V, Henley SJ, Thun MJ, Sloan FA. Benefits of Smoking Cessation for Longevity. *Am J Public Health*. 2002;92(6):990-996. doi:10.2105/AJPH.92.6.990
3. Jha P, Ramasundarahettige C, Landsman V, et al. 21st-Century Hazards of Smoking and Benefits of Cessation in the United States. *N Engl J Med*. 2013;368(4):341-350. doi:10.1056/NEJMsa1211128
4. *United States Life Tables, 1990*. U.S. Department of Health and Human Services  
[https://www.cdc.gov/nchs/data/lifetables/life90\\_2acc.pdf](https://www.cdc.gov/nchs/data/lifetables/life90_2acc.pdf). Accessed April 27, 2020.
